# Supplementary material for: Determinants of chromosome-specific telomere lengths among 2,573 All of Us participants
Source: Research Square preprint supplement (doi:10.21203/rs.3.rs-7293781/v1), 2025-08-18
Supplement: Supplementary file 1 [file 4e96cac157f298ec7ac8ca45.pdf]

# Supplementary Material

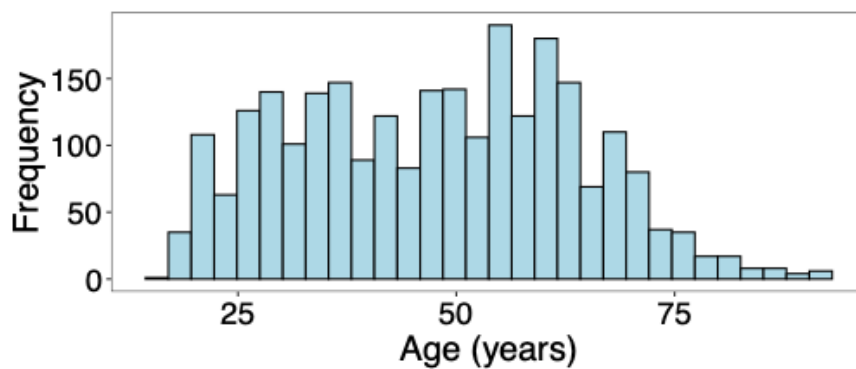

**Figure S1. Distribution of age (years) for All of Us participants (n=2,573)**

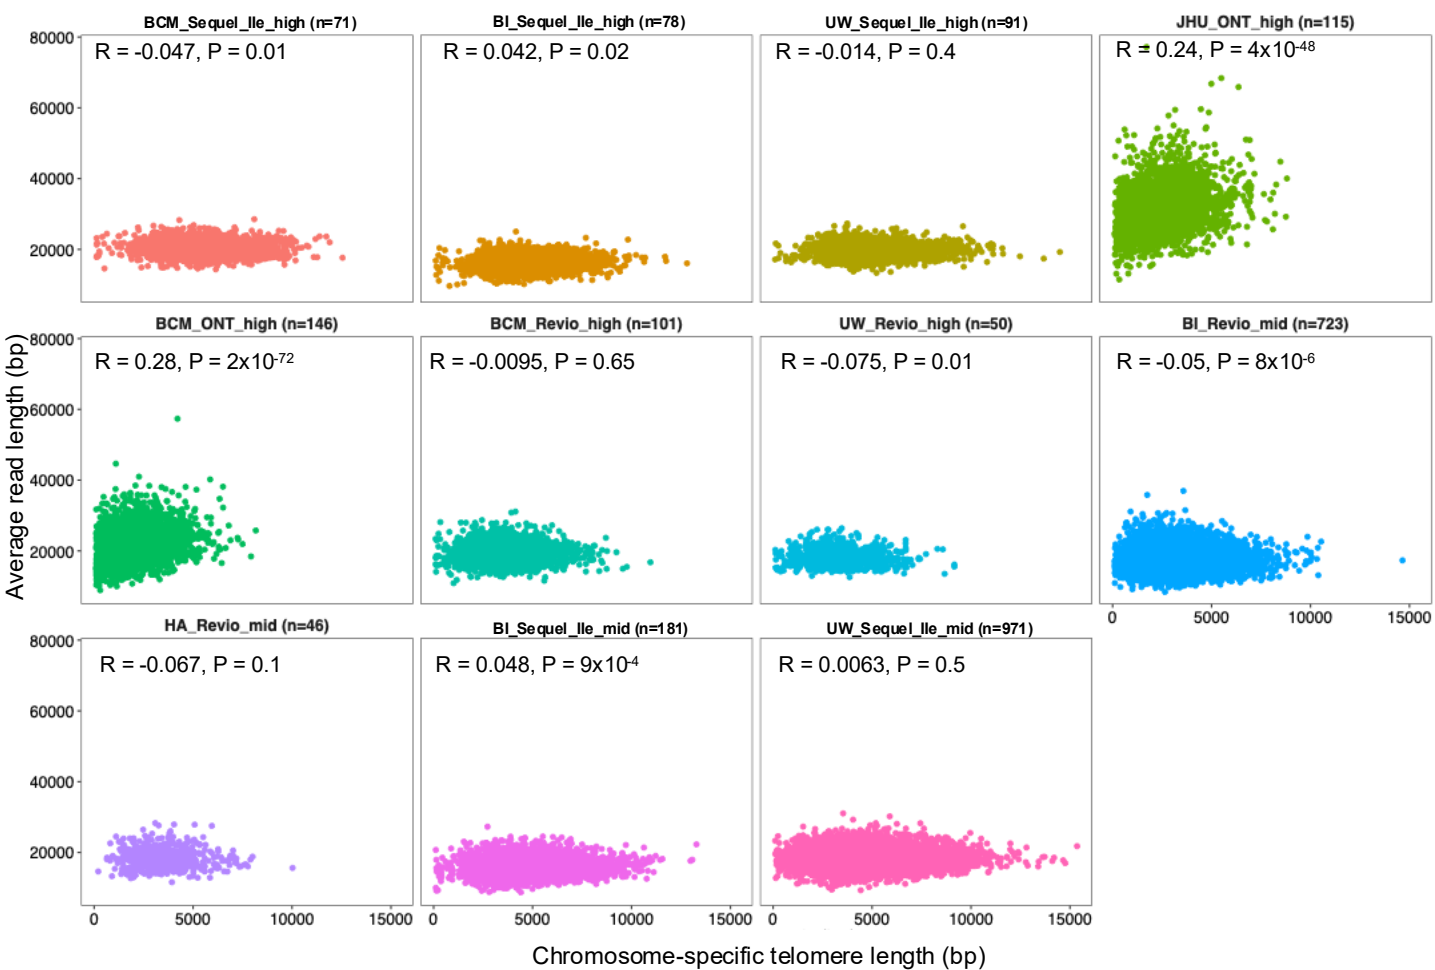

**Figure S2. Read length shows moderate correlations with csTLs in ONT samples only.** Scatterplot showing the correlation between average read length (length of reads used for estimating csTL) and corresponding csTLs. Pearson correlation and P value displayed.

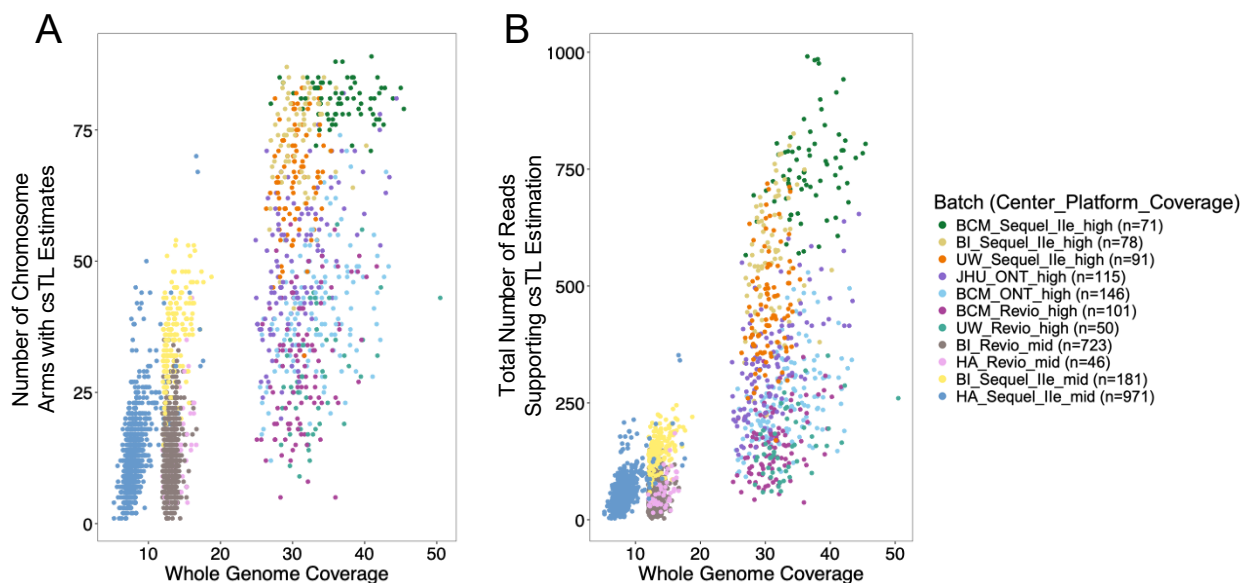

**Figure S3. Telogator2 performance shows inter-sample variability independent of whole-genome coverage.** Scatterplots showing the relationship between whole-genome coverage and (A) the number of chromosome arms with csTL estimates, (B) total number of reads supporting csTL estimation. Dot colors represent batch.

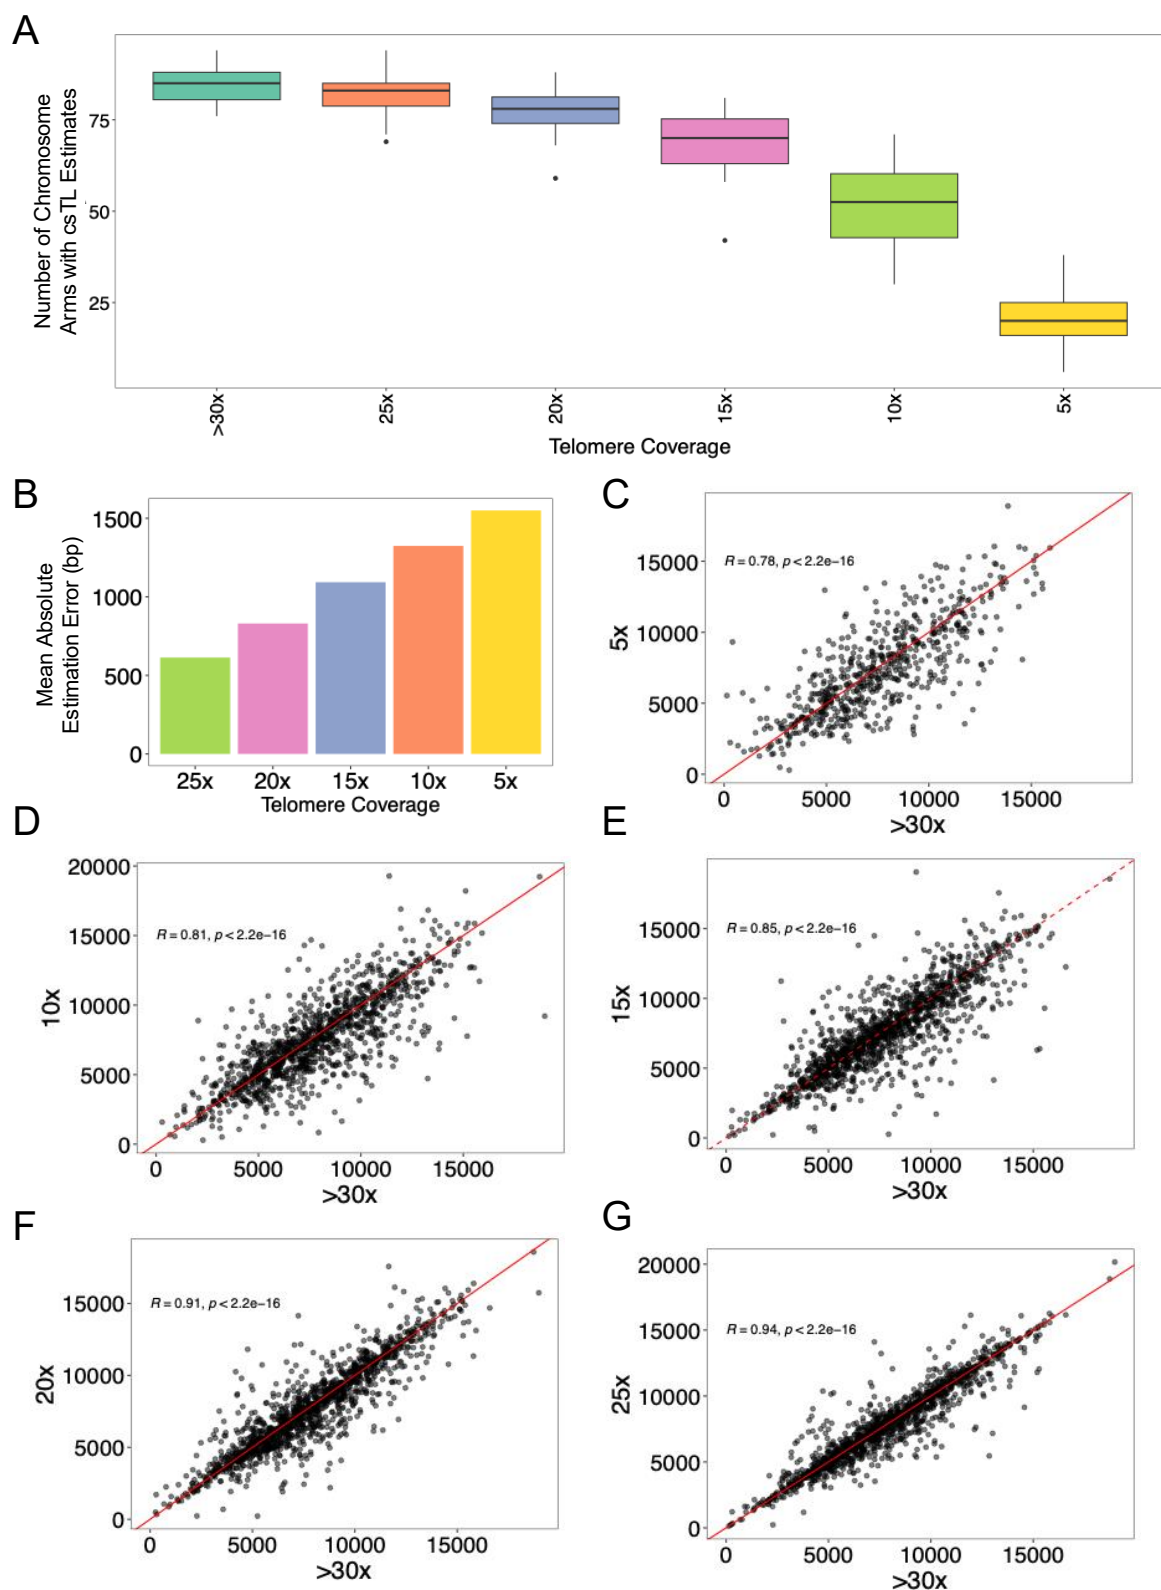

**Figure S4. Telogator2 performance across different telomere coverage levels in HPRC samples (n = 36).** (A) Box plot showing the number of chromosome arms with csTL estimates across telomere coverage levels. (B) Bar plot showing mean absolute estimation error between high-coverage (>30x) and down-sampled telomeric coverage levels of (C) 5x, (D) 10x, (E) 15x, (F) 20x, and (G) 25x.

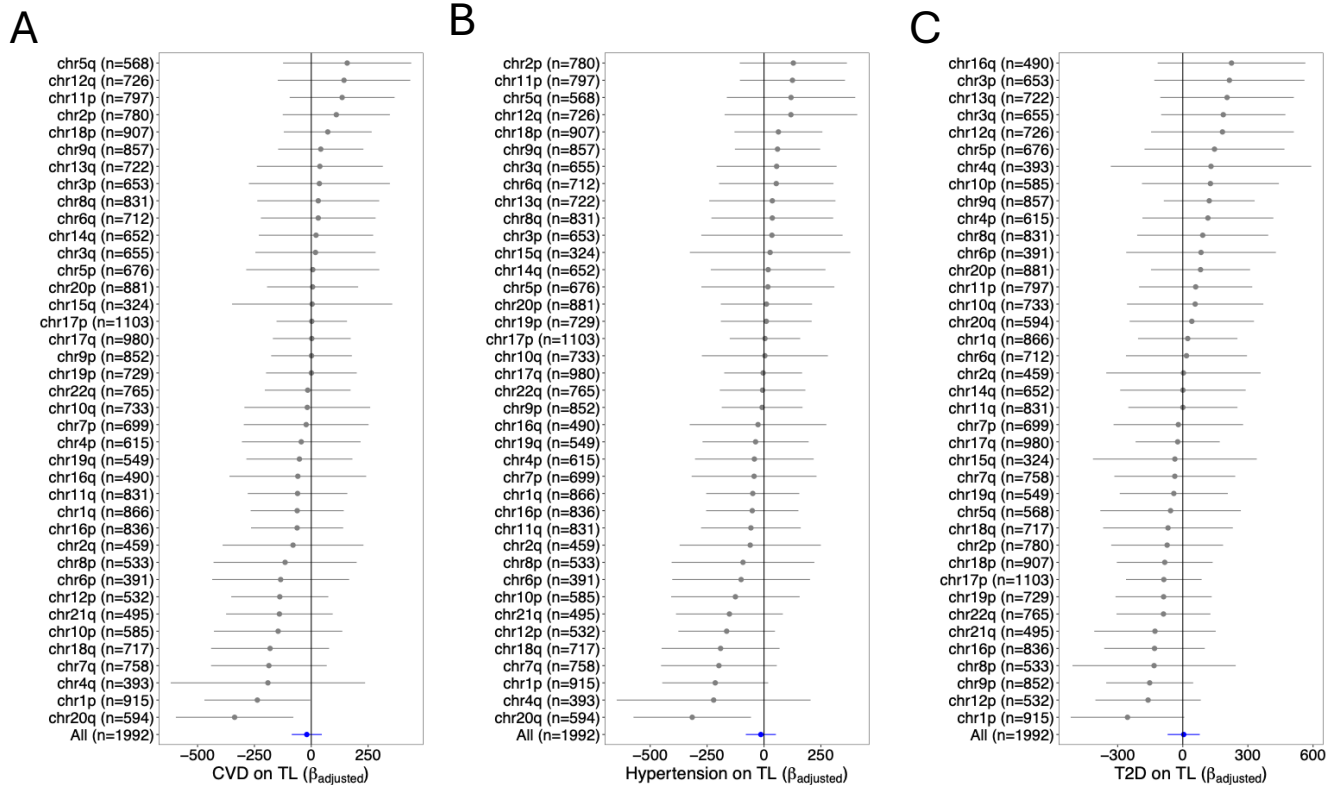

**Figure S5. Associations between chronic disease status and csTL at individual chromosome arms and across all arms (in blue).** Results are shown for (A) cardiovascular disease (844 cases, 1,148 controls), (B) hypertension (832 cases, 1,160 controls), and (C) type 2 diabetes (452 cases, 1,540 controls).

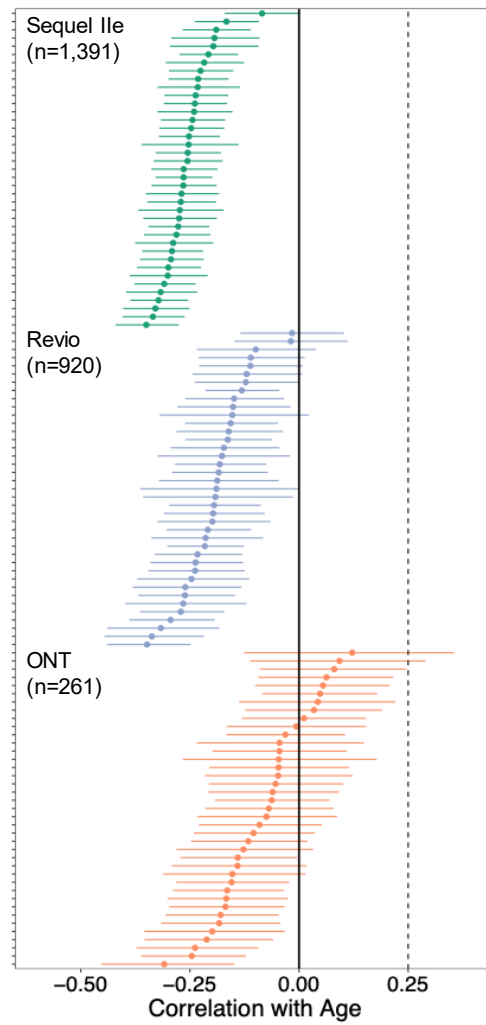

**Figure S6. ONT-derived csTLs show weaker associations with Age compared to PacBio-derived csTLs.** Forest plot showing Pearson correlations and 95% confidence intervals for the association between age (years) and csTLs for each batch. Batches are aggregated by sequencing platform.

A

HA\_Sequel\_Ile\_mid  
Hifiasm files (n=1,025)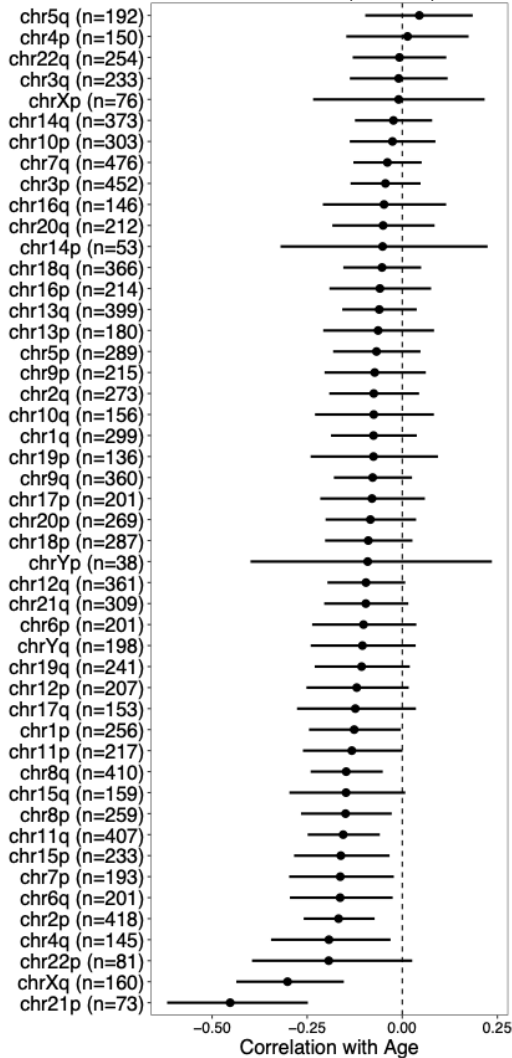

B

HA\_Sequel\_Ile\_mid  
BAM files (n=1,026)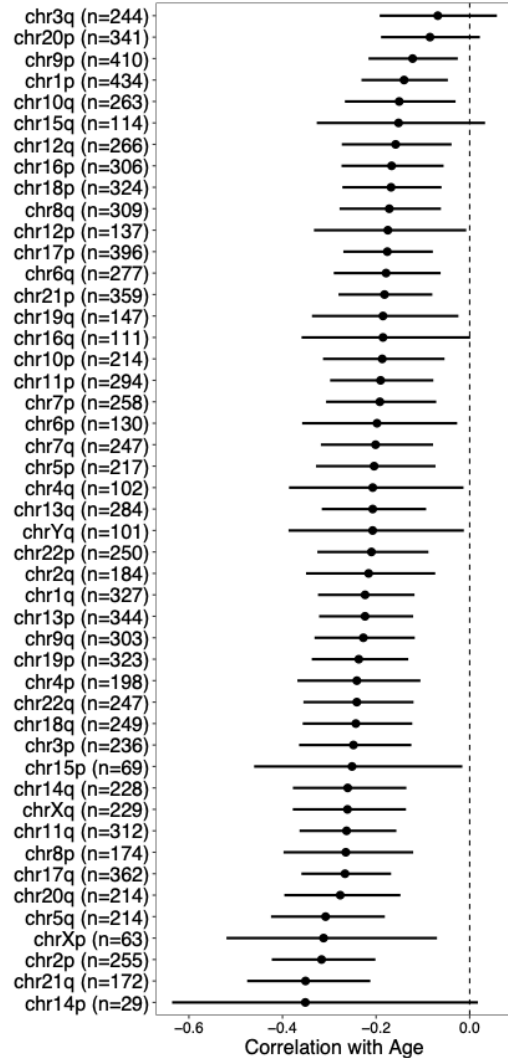

**Figure S7. BAM-based csTLs correlate more strongly with Age than hifiasm-based csTLs.**

Forest plot showing Pearson correlations and 95% confidence intervals for the association between age (years) and csTLs for Hudson Alpha Institute (HA), Sequel Ile, mid-coverage samples, using (A) Hifiasm files as input for (n=1,025) and (B) BAM files as input (n=1,026)



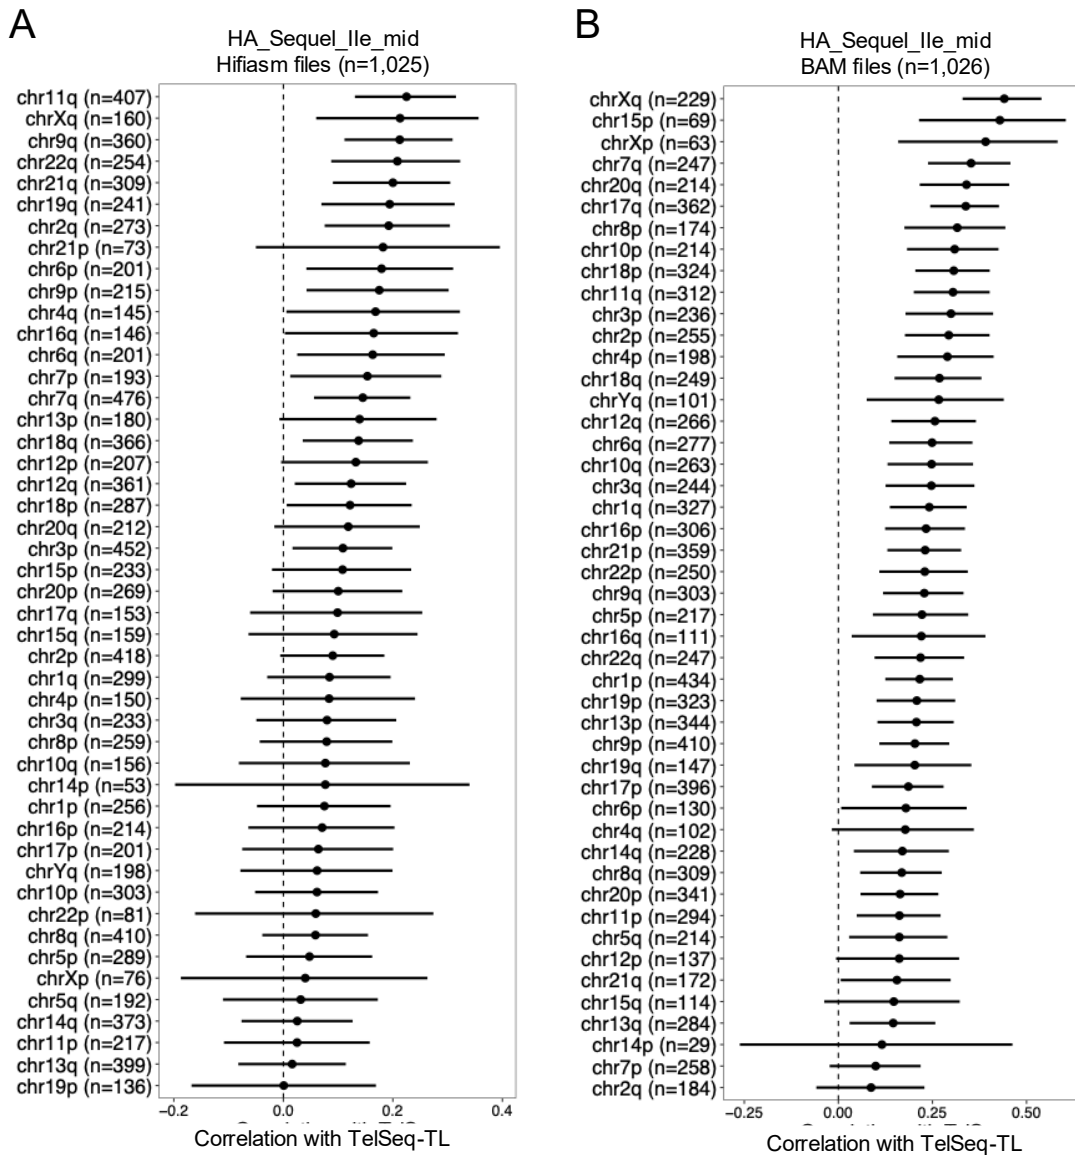

**Figure S8. BAM-based csTLs correlate more strongly with TelSeq-TL than hifiasm-based csTLs.** Forest plot showing Pearson correlations and 95% confidence intervals for the association between TelSeq-TL and csTL estimates for Hudson Alpha Institute (HA), Sequel Ile, mid-coverage samples, using (A) Hifiasm files as input for (n=1,025) and (B) BAM files as input (n=1,026)

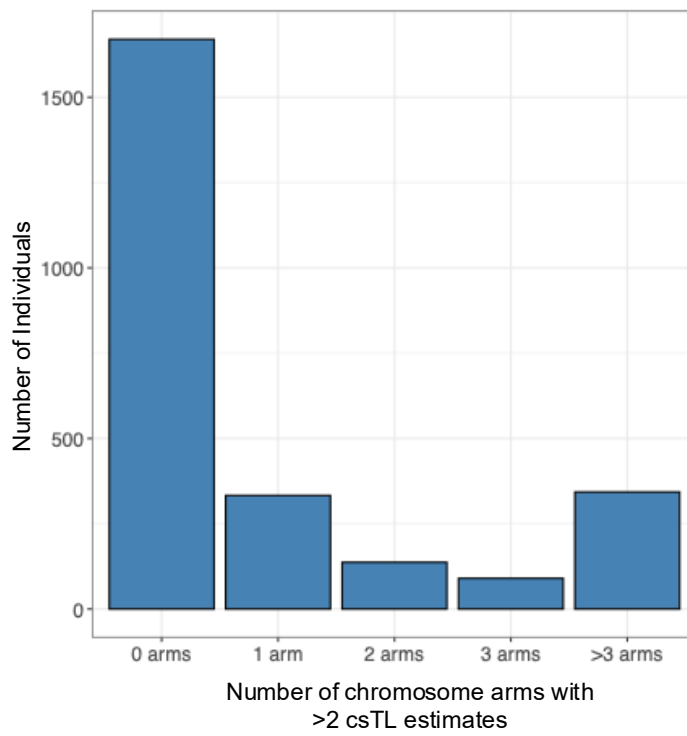

**Figure S9. Most individuals have zero chromosome arms with >2 csTL estimates.** Bar plot showing the distribution of individuals based on the number of chromosome arms they harbor with more than two csTL estimates.

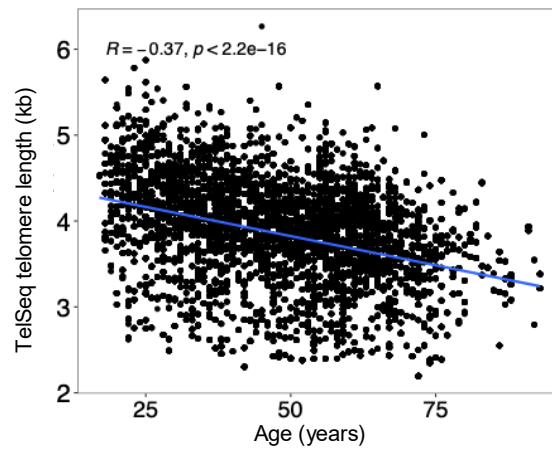

**Figure S10. Age is negatively correlated with TelSeq-TL.** Scatterplot show the correlation between age (years) and TelSeq-TL. Pearson R and P value displayed.

**Table S9.** Clinical codes extracted from the All of Us Researcher Workbench for disease identification.

|                                                                                                                                          | ICD-10                                               | ICD-9                                                |
|------------------------------------------------------------------------------------------------------------------------------------------|------------------------------------------------------|------------------------------------------------------|
| Cardiovascular Disease <ul style="list-style-type: none"><li>Hypertension</li><li>Ischemic Heart Disease</li><li>Heart Failure</li></ul> | I10, I11, I12, I13, I15<br>I20, I21, I22, I25<br>I50 | 401, 402, 403, 404, 405<br>410, 411, 413, 414<br>428 |
|                                                                                                                                          | Concept ID                                           |                                                      |
| Type 2 Diabetes                                                                                                                          | 201826, 4008576, 4193704, 443732                     |                                                      |
