# Supplementary material for: Determinants of chromosome-specific telomere lengths among 2,573 All of Us participants
Source: Research Square preprint supplement (doi:10.21203/rs.3.rs-7293781/v1), 2025-08-18
Supplement: Supplementary file 1 [file 4774f41fda98b31b2a2836f8.xlsx]

## Sheet: Table S1
Table S1. Estimates of variation in TL explained by each fixed effect
Factor	Model	PVE (%)	p (LRT)
All Fixed Effects	~ Age + Sex + BMI + Ancestry + Batch + Smoking + (1|ChrArm) + (1|Participant)	18.8	0
Age	~ Age + (1|ChrArm) + (1|Participant)	3.75	2x10-60
Sex	~ Sex + (1|ChrArm) + (1|Participant)	1.11	6x10-18
Ancestry	~ Ancestry + (1|ChrArm) + (1|Participant)	3.13	2x10-47
Smoking	~Smoking + (1|ChrArm) + (1|Participant)	0.35	1x10-6
BMI	~ BMI + (1|ChrArm) + (1|Participant)	0.23	8x10-5
Batch	~ Batch + (1|ChrArm) + (1|Participant)	14.6	1x10-289
Chromosome arm (from random effect)	~ Age + Sex+ BMI + Ancestry + Cohort+ Smoking + (1|ChrArm) + (1|Participant)	9.11	0
Individual (from random effect)	~ Age + Sex + BMI + Ancestry + Cohort + Smoking + (1|ChrArm) + (1|Participant)	8.92	0

## Sheet: Table S2
Table S2. Estimates of variation in TL explained by each fixed effect after pre-adjusting for batch
Factor	Model	PVE %	p (LRT)
All Fixed Effects	~ Age + Sex + BMI + Ancestry + Smoking + (1|ChrArm) + (1|Participant)	4.41	5x10-105
Age	~ Age + (1|ChrArm) + (1|Participant)	3.89	5x10-99
Sex	~ Sex + (1|ChrArm) + (1|Participant)	0.66	1x10-16
Ancestry	~ Ancestry + (1|ChrArm) + (1|Participant)	0.11	0.07
Smoking	~ Smoking + (1|ChrArm) + (1|Participant)	0.24	5x10-7
BMI	~ BMI + (1|ChrArm) + (1|Participant)	8x10-4	0.77
Chromosome arm (from random effect)	~ Age + Sex + BMI + Ancestry + Cohort+ Smoking + (1|ChrArm) + (1|Participant)	10.7	0
Individual (from random effect)	~ Age + Sex + BMI + Ancestry + Cohort + Smoking + (1|ChrArm) + (1|Participant)	10.6	0

## Sheet: Table S3
Table S3. Association between ancestry and TL for each chromosome arm
Chromosome Arm	Reported association between AFR vs EUR and TL						Reported Association between AFR vs AMR and TL
	Beta unadjusted	SE unadjusted	P unadjusted	Beta adjusted	SE adjusted	P adjusted	Beta unadjusted	SE unadjusted	P unadjusted	Beta adjusted	SE adjusted	P adjusted
chr1p	-579.243	253.986	0.0227715	4.14332	263	0.987434	-11.6518	128.862	0.92797	101.068	165.404	0.541309
chr1q	-285.393	198.532	0.150878	-33.7519	201.597	0.867071	-212.678	113.58	0.0614243	-259.304	137.867	0.0602835
chr2p	-510.722	223.375	0.0224574	-101.963	225.311	0.650985	-451.137	133.715	0.000772072	-423.208	156.737	0.0070601
chr2q	107.054	334.865	0.749324	427.844	337.352	0.205272	-79.6279	164.677	0.62891	-176.901	208.077	0.395615
chr3p	-127.785	324.1	0.693487	43.9496	324.922	0.892441	-159.716	171.395	0.351705	-272.894	213.282	0.201116
chr3q	-1004.58	267.989	0.000191059	-544.503	281.987	0.0538591	-490.5	138.506	0.000421842	-85.3658	178.696	0.63299
chr4p	-511.381	289.819	0.0780764	-270.106	283.421	0.340908	-254.77	140.736	0.0706724	-274.062	173.075	0.113759
chr4q	401.15	374.304	0.284401	626.96	390.9	0.109436	321.077	224.91	0.154083	673.102	279.119	0.016283
chr5p	-610.151	313.146	0.0517117	-490.884	292.049	0.0931946	-40.399	167.906	0.809923	-319.024	188.398	0.0907862
chr5q	-734.347	253.454	0.00388647	-266.456	265.453	0.315857	-330.585	151.87	0.0298482	-169.927	195.975	0.386213
chr6p	-804.301	310.695	0.00993656	-297.962	321.688	0.354813	-139.666	154.221	0.365608	-207.07	194.058	0.28652
chr6q	-387.245	287.12	0.17779	-81.4977	282.831	0.773304	-333.317	141.536	0.0187519	-310.146	174.581	0.0760145
chr7p	-127.907	248.871	0.607426	263.048	263.024	0.317565	-15.5071	147.271	0.916166	103.448	185.597	0.577422
chr7q	-709.302	233.089	0.00241093	-250.034	244.024	0.30582	-136.116	138.568	0.326218	-148.476	168.696	0.379027
chr8p	-437.685	304.926	0.151674	-240.036	313.069	0.44354	-80.9097	172.416	0.639039	-432.444	211.117	0.0409451
chr8q	-148.122	276.967	0.592911	217.545	284.047	0.443939	-196.319	150.522	0.192456	-198.89	186.948	0.28765
chr9p	-634.558	191.265	0.000940853	-369.583	192.898	0.0556644	-194.394	98.3075	0.0482732	-86.6399	123.196	0.482056
chr9q	-476.714	194.688	0.0145102	-193.861	194.503	0.319154	-293.631	103.884	0.00479861	-255.522	125.386	0.0418254
chr10p	-313.874	296.228	0.289717	277	292.897	0.344631	-88.9243	160.558	0.579866	-389.895	197.179	0.0484114
chr10q	-885.899	270.72	0.00110946	-386.947	284.634	0.174368	-747.64	148.27	5.6194e-07	-632.277	194.535	0.00119924
chr11p	-350.193	241.675	0.147665	-80.4313	242.421	0.740128	-155.073	125.22	0.215875	67.322	153.055	0.660145
chr11q	-476.96	209.032	0.0227172	-89.9701	212.517	0.672131	-281.196	122.869	0.0223147	-348.883	150.649	0.0207728
chr12p	-495.25	182.478	0.00682883	-142.417	198.685	0.473771	-346.414	116.764	0.00312334	-246.383	148.583	0.0977805
chr12q	-322.032	281.721	0.253323	11.3363	285.823	0.968372	-2.64332	159.372	0.986771	66.5423	195.301	0.733403
chr13q	316.147	315.288	0.316283	77.6294	305.946	0.799763	-90.4267	154.128	0.557564	-284.302	186.749	0.128297
chr14q	-565.117	259.352	0.0296407	-403.907	260.803	0.121874	-146.922	137.153	0.284404	-95.5708	169.357	0.572708
chr15q	63.9431	315.544	0.839523	206.029	341.931	0.547185	-106.153	184.27	0.564911	-18.543	230.711	0.935985
chr16p	-561.103	191.346	0.00344276	-139.256	196.746	0.479244	-187.034	109.919	0.089158	60.7241	136.524	0.656575
chr16q	-674.789	231.555	0.0037052	-168.353	257.042	0.512761	-498.854	169.55	0.00338997	-297.943	212.539	0.161517
chr17p	-244.769	148.139	0.0987168	-18.6284	152.734	0.902945	-76.0532	86.1316	0.377406	0.466279	103.628	0.996411
chr17q	-505.902	168.983	0.00281369	-95.5537	175.764	0.586791	-298.595	96.7561	0.00207635	-55.0382	118.256	0.641723
chr18p	-319.669	188.546	0.090284	-67.1175	194.997	0.730767	-249.473	106.452	0.0192863	-229.928	131.079	0.0797019
chr18q	-586.213	270.066	0.0302325	-216.111	274.244	0.430902	4.45234	147.347	0.975901	-35.9782	180.855	0.842362
chr19p	35.192	203.253	0.86258	147.671	210.395	0.482952	-60.7582	109.953	0.580696	-92.2891	142.946	0.518702
chr19q	-450.089	207.935	0.030786	-331.668	217.487	0.127756	-337.955	125.711	0.00736566	-508.146	153.159	0.000959207
chr20p	-511.218	214.022	0.0170915	-146.377	219.587	0.505179	-272.002	109.282	0.0129688	-89.7372	140.248	0.522418
chr20q	-466.085	237.873	0.0504639	-140.373	260.765	0.590536	-138.576	130.691	0.289358	84.9117	175.937	0.629514
chr21q	-663.224	222.903	0.00304604	-600.636	234.096	0.0105461	-31.1133	130.517	0.811666	-96.5981	163.011	0.553691
chr22q	-558.455	190.976	0.00353898	-323.263	195.214	0.0980825	-285.842	102.426	0.00536914	-240.288	128.228	0.0612677

## Sheet: Table S4
Table S4. Association between sex and TL for each chromosome arm
Chromosome Arm	Reported Association (Female vs Male and TL)
	n	Beta unadjusted	SE unadjusted	P unadjusted	Beta adjusted	SE adjusted	P adjusted
chr1p	1055	-275.05	111.404	0.0137092	-166.232	108.81	0.126884
chr1q	1023	-263.001	97.0433	0.00683813	-155.059	91.2537	0.0895899
chr2p	928	-221.484	116.346	0.0572636	-125.276	107.77	0.245362
chr2q	545	-401.024	144.211	0.00561068	-365.957	139.79	0.00910164
chr3p	769	-397.012	148.375	0.00761568	-305.467	139.763	0.0291528
chr3q	781	-251.313	119.537	0.035839	-284.843	121.042	0.0188624
chr4p	723	-223.815	126.024	0.0761582	-113.973	120.174	0.343253
chr4q	471	-536.475	192.261	0.00547968	-370.664	184.019	0.0445717
chr5p	801	-238.66	144.901	0.0999394	-45.5036	129.347	0.725086
chr5q	674	-464.643	131.57	0.000441396	-409.201	126.077	0.00123142
chr6p	469	-181.579	133.489	0.174407	-36.0575	135.358	0.790063
chr6q	848	-318.7	124.853	0.0108668	-229.184	118.263	0.0529729
chr7p	828	-353.884	125.866	0.00504629	-314.802	122.45	0.010322
chr7q	893	-395.183	119.139	0.000946768	-268.734	113.807	0.0184283
chr8p	638	-427.419	147.672	0.00392915	-231.997	144.594	0.109121
chr8q	977	-319.78	130.775	0.0146502	-231.304	124.446	0.0633809
chr9p	992	-336.975	83.3977	5.74478e-05	-241.283	80.2352	0.00270435
chr9q	1015	-389.634	88.5336	1.19184e-05	-246.041	83.9104	0.0034427
chr10p	686	-449.687	137.486	0.00112627	-299.291	130.171	0.0218008
chr10q	856	-401.38	131.37	0.00231794	-301.89	122.933	0.0142617
chr11p	943	-362.268	108.203	0.000846153	-246.308	104.974	0.0191675
chr11q	988	-343.275	106.88	0.00136191	-176.177	100.368	0.079523
chr12p	636	-278.483	102.712	0.00688344	-198.056	97.713	0.0430993
chr12q	857	-218.433	137.247	0.11186	-67.0996	131.674	0.610474
chr13q	846	-410.267	133.719	0.00222283	-292.918	125.135	0.0194784
chr14q	768	-452.511	120.014	0.000175476	-352.2	114.54	0.00218207
chr15q	382	-366.928	164.305	0.0261167	-402.002	163.302	0.0142908
chr16p	974	-343.577	95.2051	0.000323292	-160.016	92.1821	0.0829097
chr16q	581	-293.823	139.25	0.0352828	-147.333	133.517	0.27029
chr17p	1305	-258.572	72.7437	0.00039215	-157.292	69.814	0.0244259
chr17q	1165	-326.839	83.5725	9.72967e-05	-197.606	78.5877	0.0120574
chr18p	1069	-219.771	92.0486	0.0171344	-99.9798	87.7348	0.254726
chr18q	866	-233.154	126.682	0.0660426	-104.982	120.565	0.384139
chr19p	850	-250.59	94.2582	0.00799568	-173.832	91.766	0.0585321
chr19q	653	-276.413	110.452	0.0125741	-208.658	106.096	0.0496534
chr20p	1031	-266.692	94.5929	0.00490414	-138.099	90.6197	0.127836
chr20q	707	-317.774	113.712	0.00533837	-248.13	112.814	0.0281771
chr21q	595	-449.679	113.206	7.9968e-05	-425.463	109.154	0.000108463
chr22q	915	-282.464	90.3728	0.00183086	-156.209	86.4574	0.0711322

## Sheet: Table S5
Table S5. Association between smoking status and TL for each chromosome arm
Chromosome Arm	Reported Association (Never vs Ever Smoker and TL)
	n	Beta unadjusted	SE unadjusted	P unadjusted	Beta adjusted	SE adjusted	P adjusted
chr1p	1055	-135.831	112.422	0.227232	77.3396	108.959	0.477984
chr1q	1023	-265.735	97.9944	0.00680553	-90.7106	91.3659	0.321033
chr2p	928	-203.849	117.692	0.0835975	-23.4677	108.874	0.829388
chr2q	545	-217.438	146.842	0.139248	65.3578	141.056	0.643308
chr3p	769	-147.427	150.704	0.328256	94.5043	141.07	0.503121
chr3q	781	96.5385	119.905	0.420993	200.925	118.651	0.0907862
chr4p	723	-178.94	127.712	0.161608	-106.401	118.934	0.371294
chr4q	471	-523.162	199.545	0.00903181	-210.188	191.472	0.272897
chr5p	801	-321.86	145.486	0.0272269	-137.245	131.113	0.295529
chr5q	674	-112.929	133.912	0.399353	59.4442	127.638	0.641566
chr6p	469	-133.366	137.89	0.333949	-10.4448	136.429	0.939009
chr6q	848	-256.1	126.754	0.0436511	-34.0341	118.313	0.773678
chr7p	828	-322.346	126.747	0.0111651	-49.069	123.852	0.692069
chr7q	893	-216.529	121.128	0.0741793	7.84728	115.022	0.945623
chr8p	638	-183.457	152.122	0.228272	-20.9586	145.52	0.885527
chr8q	977	-214.155	131.703	0.104264	-18.131	124.052	0.883829
chr9p	992	-204.346	84.4642	0.0157287	-72.4118	80.1415	0.366458
chr9q	1015	-181.126	90.1633	0.0448166	14.3347	84.1709	0.864805
chr10p	686	-360.47	139.109	0.00976626	-69.1763	130.175	0.595311
chr10q	856	-78.3347	134.849	0.561458	92.3277	125.876	0.46347
chr11p	943	-286.87	109.467	0.00891868	-149.449	104.743	0.153968
chr11q	988	-361	106.632	0.000738559	-124.425	100.458	0.215801
chr12p	636	21.8833	107.619	0.838935	185.851	103.657	0.0734715
chr12q	857	-262.008	139.218	0.0601771	-110.968	131.725	0.399792
chr13q	846	-443.477	135.858	0.00114164	-172.415	125.749	0.170714
chr14q	768	-293.35	122.189	0.0165969	-18.546	114.66	0.871548
chr15q	382	80.9225	167.302	0.628883	236.06	163.243	0.149019
chr16p	974	-264.555	96.1302	0.00603266	-54.8438	91.9367	0.550957
chr16q	581	-217.408	144.039	0.131751	-105.164	141.675	0.458221
chr17p	1305	-172.31	73.5443	0.0192824	-38.4167	70.1921	0.584262
chr17q	1165	-154.782	85.2177	0.069579	-11.6044	78.67	0.882757
chr18p	1069	-243.926	93.4532	0.00917728	-95.2363	88.673	0.283061
chr18q	866	-69.3812	127.694	0.587036	171.301	121.3	0.158253
chr19p	850	-178.312	95.0897	0.0611083	36.1273	92.112	0.695003
chr19q	653	-269.882	112.909	0.0171203	-74.9374	107.62	0.486486
chr20p	1031	-354.346	95.9714	0.000233992	-166.082	91.8333	0.0708221
chr20q	707	-141.906	116.479	0.223518	39.3697	114.78	0.731703
chr21q	595	-197.146	116.135	0.0901168	-7.76013	111.144	0.944361
chr22q	915	-266.987	92.0069	0.00379921	-155.974	87.001	0.0733448

## Sheet: Table S6
Table S6. Association between age and TL for each chromosome arm
Chromosome Arm	Reported Association (Age and TL)
	n	Pearson R	Beta unadjusted	SE unadjusted	P unadjusted	Beta adjusted	SE adjusted	P adjusted
chr1p	1055	-0.200135	-22.5295	3.3989	5.40567e-11	-20.3585	3.31852	1.21109e-09
chr1q	1023	-0.260094	-24.5964	2.85772	2.79831e-17	-21.3133	2.67544	4.41015e-15
chr2p	928	-0.257539	-27.6234	3.40586	1.59107e-15	-25.5056	3.18518	3.56013e-15
chr2q	545	-0.193026	-20.2657	4.4208	5.66182e-06	-17.3825	4.36035	7.65217e-05
chr3p	769	-0.231393	-29.9962	4.55374	8.32344e-11	-25.8302	4.35897	4.73446e-09
chr3q	781	-0.0668892	-6.67441	3.56709	0.0617049	-5.98174	3.426	0.0812168
chr4p	723	-0.269418	-27.8747	3.71066	1.72634e-13	-26.0946	3.55722	6.08102e-13
chr4q	471	-0.242031	-31.3313	5.7998	1.0491e-07	-24.1673	5.5159	1.46679e-05
chr5p	801	-0.255646	-32.0755	4.29125	2.03609e-13	-28.1213	3.86471	8.33966e-13
chr5q	674	-0.212074	-22.1718	3.94126	2.71481e-08	-20.2062	3.81139	1.57088e-07
chr6p	469	-0.175871	-16.1	4.17015	0.000128951	-15.7642	4.04047	0.000110136
chr6q	848	-0.235623	-26.0788	3.69812	3.66808e-12	-23.6237	3.49066	2.47219e-11
chr7p	828	-0.210362	-23.4159	3.78638	9.805e-10	-20.2221	3.67105	4.86245e-08
chr7q	893	-0.254872	-28.4257	3.61298	1.04408e-14	-22.8223	3.49505	1.11449e-10
chr8p	638	-0.271884	-32.1541	4.51283	2.82895e-12	-28.3051	4.42781	3.20932e-10
chr8q	977	-0.222184	-28.2084	3.96434	2.15782e-12	-24.8014	3.79186	9.9452e-11
chr9p	992	-0.190571	-15.7479	2.57818	1.44659e-09	-13.7757	2.46422	2.943e-08
chr9q	1015	-0.255984	-22.6669	2.68942	1.19327e-16	-19.9786	2.56024	1.51623e-14
chr10p	686	-0.257273	-28.3994	4.07865	7.8317e-12	-23.9964	3.90103	1.32371e-09
chr10q	856	-0.198402	-23.2609	3.93216	4.7832e-09	-20.9279	3.72424	2.60893e-08
chr11p	943	-0.222342	-22.4116	3.20366	5.00912e-12	-19.1886	3.07028	6.26448e-10
chr11q	988	-0.289969	-29.976	3.15074	1.359e-20	-28.4553	3.01429	2.67821e-20
chr12p	636	-0.32143	-25.3535	2.96638	9.42825e-17	-22.9046	2.93008	2.33894e-14
chr12q	857	-0.228037	-28.3744	4.14327	1.4271e-11	-22.2572	4.00974	3.81561e-08
chr13q	846	-0.233229	-27.9246	4.00764	6.4828e-12	-22.9863	3.73148	1.13354e-09
chr14q	768	-0.320084	-33.3866	3.57045	9.34132e-20	-28.8513	3.43777	2.36151e-16
chr15q	382	-0.24366	-23.9835	4.89718	1.43902e-06	-20.0871	4.77747	3.29631e-05
chr16p	974	-0.21746	-19.3563	2.7867	6.87395e-12	-16.8468	2.67673	4.71241e-10
chr16q	581	-0.140429	-14.6362	4.28852	0.000687706	-12.9623	4.08646	0.0015964
chr17p	1305	-0.214057	-17.3956	2.19915	5.44841e-15	-14.5556	2.11883	9.99504e-12
chr17q	1165	-0.291385	-25.0479	2.41128	3.11303e-24	-21.3405	2.33083	2.40992e-19
chr18p	1069	-0.225711	-20.9305	2.76561	8.16151e-14	-18.9595	2.64604	1.45937e-12
chr18q	866	-0.296292	-34.2222	3.75301	5.22366e-19	-30.7678	3.68885	2.97085e-16
chr19p	850	-0.220245	-18.9909	2.88832	8.49287e-11	-16.2222	2.78514	8.17936e-09
chr19q	653	-0.198884	-17.2344	3.32846	2.99472e-07	-15.4921	3.18303	1.43042e-06
chr20p	1031	-0.210524	-19.7008	2.85188	8.59826e-12	-15.0311	2.75537	6.14837e-08
chr20q	707	-0.26087	-24.2435	3.37888	1.83503e-12	-23.5779	3.3681	6.07093e-12
chr21q	595	-0.266426	-22.7634	3.38177	3.97733e-11	-19.2758	3.33091	1.17677e-08
chr22q	915	-0.258779	-21.1664	2.61475	1.82112e-15	-19.3913	2.51942	3.67851e-14

## Sheet: Table S7
Table S7. Interaction effect between fixed effect covariates and chromosome arm on TL variation
Interaction with Chromosome Arm	pLRT
TL ~ Age + Sex + Smoking + BMI + Ancestry + Batch + (1+Age|Chr) + 1|Individual	1.61916e-16
TL ~ Sex + Age + Smoking + BMI + Ancestry + Batch + (1+Sex|Chr) + 1|Individual	0.480087
TL ~ Smoking + Age + Sex + BMI + Ancestry + Batch + (1+Smoking|Chr) + 1|Individual	0.0393579
TL ~ Ancestry + Age + Sex + Smoking + BMI + Batch + (1+Ancestry|Chr) + 1|Individual	0.157858

## Sheet: Table S8
Table S8. Association of chronic disease status with mean and shortest TL
Cardiovascular disease conditions	Cases	Controls	ORmin	P-value	ORfull	P-value
(hypertension, ischemic heart disease, and heart failure)	(n)	(n)	(95% CI)		(95% CI)
Association with mean TL	844	1148	0.92	0.22	0.94	0.4
			(0.80, 1.05)		(0.81,1.08)
Association with shortest TL	778	1025	0.92	0.19	0.94	0.35
			(0.81, 1.04)		(0.82, 1.07)
Hypertension
Association with mean TL	832	1160	0.93	0.31	0.96	0.56
			(0.81, 1.07)		(0.83, 1.10)
Association with shortest TL	768	1035	0.92	0.19	0.94	0.35
			(0.81, 1.04)		(0.82, 1.07)
Type 2 Diabetes
Association with mean TL	452	1540	0.97	0.7	1	0.95
			(0.83, 1.13)		(0.85,0.85)
Association with shortest TL	424	1379	0.94	0.37	0.98	0.74
			(0.81, 1.08)		(0.84, 1.13)
OR = odds ratio; CI = confidence interval.
Estimates are from logistic regression models. Odds ratios per 1kb increase in telomere length or per unit increase in short telomere abundance
The minimal model is adjusted for age, sex, and batch. The full model is adjusted for age, sex, batch, BMI, ancestry, and smoking.
